# Supplementary material for: Small Non-Coding RNAs as New Biomarkers to Evaluate the Quality of the Embryo in the IVF Process
Source: MDPI journal article supplement (doi:10.3390/biom12111687), 2022-11-14
Supplement: s1 [file s1]

## Article

# Small non-coding RNAs as new biomarkers to evaluate the quality of the embryo in the IVF process

Silvia Toporcerová<sup>1,2†</sup>, Ivana Špaková<sup>3†</sup>, Katarína Šoltys<sup>4</sup>, Zuzana Klepcová<sup>3</sup>, Marek Kl'oc<sup>5</sup>, Júlia Bohošová<sup>6</sup>, Karolína Trachtová<sup>6</sup>, Lucia Peterová<sup>2</sup>, Helena Mičková<sup>7</sup>, Peter Urdzík<sup>1</sup>, Mária Mareková<sup>3</sup>, Ondřej Slabý<sup>6</sup>, Miroslava Rabajdová<sup>3,5\*</sup>

<sup>1</sup> Department of Gynaecology and Obstetrics, Faculty of Medicine, Pavol Jozef Šafárik University in Košice, Košice, Slovakia

<sup>2</sup> GynCare a.s., Košice, Slovakia

<sup>3</sup> Department of Medical and Clinical Biochemistry, Faculty of Medicine, Pavol Jozef Šafárik University in Košice, Košice, Slovakia

<sup>4</sup> Faculty of Natural Sciences, Comenius University in Bratislava, Bratislava, Slovakia

<sup>5</sup> SAFTRA-BioMAI, Pavol Jozef Šafárik University in Košice, Košice, Slovakia

<sup>6</sup> Central European Institute of Technology, Masaryk University, Brno, Czech Republic

<sup>7</sup> Department of Medical Biology, Faculty of Medicine, Pavol Jozef Šafárik University in Košice, Košice, Slovakia

<sup>†</sup> both authors contributing as a first author

\* Correspondence: miroslava.rabajdova@upjs.sk; Tel.: +421 55 234 3377

**Citation:** Lastname, F.; Lastname, F.; Lastname, F. Title. *Biomolecules* **2022**, *12*, x. <https://doi.org/10.3390/xxxxx>

Academic Editor: Firstname  
Lastname

Received: date  
Accepted: date  
Published: date

**Publisher's Note:** MDPI stays neutral with regard to jurisdictional claims in published maps and institutional affiliations.

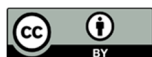

**Copyright:** © 2022 by the authors. Submitted for possible open access publication under the terms and conditions of the Creative Commons Attribution (CC BY) license (<https://creativecommons.org/licenses/by/4.0/>).

**Table 1.** Selected miRNAs from the SBM and their respective target genes.

| process                  | miRNA with successfully implanted blastocysts | target genes           | miRNA with non-successfully implanted blastocysts | target genes                 |
|--------------------------|-----------------------------------------------|------------------------|---------------------------------------------------|------------------------------|
| proliferation            | miR-20a [9]                                   | PTEN, ATG7, TIMP2      | miR-373-3p [33]                                   | ----                         |
|                          | miR-30c [9]                                   | APC, KRAS, PIK3CD      | miR-518a-3p [33]                                  | NIK                          |
|                          | miR-19b-3p [33]                               | PTEN                   | miR-191 [34]                                      | EGR1                         |
|                          | miR-372-3p [33]                               | ----                   |                                                   |                              |
|                          | miR-634 [37]                                  | mTOR                   |                                                   |                              |
|                          | let-7b-5p [32, 38]                            | TGFBR1, NRAS           |                                                   |                              |
| angiogenesis             | miR-29c-3p [37]                               | COL4                   | miR-373-3p [33]                                   | VEGF-A                       |
|                          | miR-20a [39]                                  | VEGF-A, HIF-1 $\alpha$ |                                                   |                              |
|                          | miR-634 [37]                                  | JAG                    |                                                   |                              |
| viability                | miR-20a [40]                                  | BCL2                   | miR-182-5p [33]                                   | CASP9                        |
|                          | miR-92a-3p [38]                               | -----                  |                                                   |                              |
|                          | let-7b-5p [38]                                | NRAS                   |                                                   |                              |
| cell cycle               | miR-20a [9]                                   | CDKN1A/p21, CCND1      | miR-142-3p [36]                                   | CCND1                        |
|                          |                                               |                        | miR-372 [34]                                      | CDK2, CDK6, MAPK3, CYCLIN A1 |
|                          |                                               |                        | miR-302a-3p [33]                                  | HMGA2, CCND1, OCT4, SOX2     |
|                          |                                               |                        | miR-191 [34]                                      | CDK6, MAPK3                  |
| apoptosis                | miR-634 [37]                                  | mTOR                   | miR-372 [34]                                      | MAP3K1, CDK6                 |
|                          | let-7b-5p [32]                                | TNFRSF10B              | miR-518a-3p [33]                                  | NIK                          |
|                          |                                               |                        | miR-302a-3p [33]                                  | HMGA2                        |
|                          |                                               |                        | miR-191 [34]                                      | MAP3K, CDK6                  |
| implantation             | let-7b-5p [32]                                | IGF1R, MUC1            | miR-661 [35]                                      | MDM2                         |
|                          | let-7i-5p [32]                                | AKT2                   | miR-519d-3p [33]                                  | MMP2                         |
|                          |                                               |                        | miR-302a-3p [33]                                  | SOCS5, HMGA2                 |
| blastocyst's development | let-7b-5p [32]                                | AKT2, FOXO1, IGF2BP2   |                                                   |                              |
|                          | let-7i-5p [32]                                | TEAD1, BUB1B, FOXO1    |                                                   |                              |
